1 **Prediction of Direct Carbon Emissions of Chinese Provincial Residents under Artificial**

2 **Neural Networks in Deep Learning Environment**

3 **Hui, Jin**

4 **School of Economics, Shanghai University of Finance and Economics**

6     **Abstract:** It is aimed to deepen the understanding of the consumption carbon emissions of Chinese provinces,  
7     establish an accurate and feasible carbon emission prediction model, develop an urban low-carbon economy,  
8     and ensure the sustainable development of Chinese cities. Through the national statistical data information,  
9     based on the artificial neural network model, mathematical statistics and deep learning methods are used to learn  
10    and analyze the carbon emission data of various provinces in China from 1999 to 2019. The neural network  
11    toolbox in Matlab is used to program separately to realize the prediction of carbon emissions by different neural  
12    network models. After comparing and analyzing the accuracy and prediction performance, the optimal model  
13    for the prediction effect is selected. Finally, based on ArcGIS Engine (Arc Geographic Information Science  
14    Engine) and C#.NET platform, the call to Matlab neural network toolbox is realized. The selected model is  
15    embedded in the prediction system to complete the development of the entire system. The results show that the  
16    carbon emissions of residents in the north are distinctly higher than those in the south. Also, with the passage of  
17    time, the rate of carbon emissions continues to accelerate. Compared with other models, Elman neural network  
18    has higher accuracy and smaller error in carbon emission prediction. Compared to BP (Back Propagation) neural  
19    network, the accuracy is improved by 55.93%, and the prediction performance is improved by 19.48%. The  
20    prediction results show that China is expected to reach the peak of carbon emissions from 2027 to 2032. This  
21    investigation will provide a theoretical basis to control and plan carbon emissions from Chinese urban residents.

22    **Keywords:** Deep learning; Artificial neural network; Provincial residents; Carbon emission prediction; Optimal  
23    model

## 24    1. Introduction

25        Recently, with the continuous expansion of the field of human activities, the ecology of nature is facing  
26    many problems. A series of environmental problems such as global warming, frequent extreme weather, and  
27    melting glaciers threaten human survival and health [1]. Among them, global warming has become an important  
28    issue of common concern in today's society and related investigations have also emerged endlessly [2]. It is  
29    found that the main factors affecting climate warming come from the continuous emission of CO<sub>2</sub> [3]. To reduce  
30    carbon emissions, countries have implemented the most stringent measures [4]. China is the largest developing  
31    country in the world today and one of the major energy-consuming countries [5]. As a big country that takes  
32    charge of the human living environment, China has the responsibility to actively undertake emission reduction  
33    tasks according to its ability while doing well in national economic development [6]. The carbon emissions

34 brought about by rapid urbanization and industrialization as well as the direct carbon consumption of residential  
35 energy have become the main part of China's greenhouse gas emissions [7]. Relevant investigations show that in  
36 developed countries, as the industrial level continues to decrease, more residents in cities continue to increase  
37 their carbon emissions. Some regions have exceeded industrial carbon emissions [8]. Therefore, according to the  
38 current energy consumption and carbon consumption levels of residents in various provinces of China, it is  
39 greatly significant to predict the direct carbon emissions of Chinese residents.

40 The neural network is a newly developed computer technology in recent years. It relies on its unique  
41 network structure characteristics and data processing methods to achieve fruitful results in many fields [9]. It  
42 includes engineering automation, image recognition, model prediction, and signal processing. Among them, the  
43 use of neural networks to build prediction models is a relatively common method [10]. There have been many  
44 investigations on the application of neural network prediction models in carbon emissions. Among them, Ye et  
45 al. (2018) used neural networks to predict carbon emissions in the construction industry. It was found that the  
46 economic development of the construction industry and the improvement of standards may have a significant  
47 impact on future carbon dioxide emissions [11]. Balki et al. (2018) used back-propagation artificial neural  
48 networks to develop models that can estimate engine performance and exhaust emissions. It was found that the  
49 carbon emissions of ethanol vehicles were reduced by 6% compared to gasoline vehicles [12]. Liu et al. (2017)  
50 used chaos theory combined with BP (Back Propagation) neural network to fit and predict carbon emission time  
51 series without considering other factors. It was easier and more accurate than other prediction methods [13].  
52 Kim et al. (2017) used the newly developed neural network model to predict and store with high accuracy. It can  
53 effectively evaluate the carbon emissions from industry and residents in the deep brine [14]. From the above  
54 works, it can be seen that the use of neural network models in carbon emissions prediction has been one of the  
55 hot issues in this field. But the relevant works almost revolve around automobiles, buildings, and industries in  
56 developed countries. Few works have involved predictions of residential carbon emissions.

57 The intelligent methods are innovatively used to explore residents' direct carbon emissions in the  
58 investigation. Different neural network models are used to conduct a comparative investigation in terms of the  
59 error between the true value and the predicted value, the residual error of the prediction result, and the MSE  
60 (Mean Squared Error). Through the use of mathematical statistics and deep learning methods, the carbon  
61 emission data of each province in 1999-2019 are learned and analyzed. Based on a common language  
62 development platform, GIS (Geographic Information Science) components are combined and carbon emission  
63 prediction models are embedded to design a comprehensive and integrated visual intelligent platform. The

64 platform can be developed to predict the direct carbon emissions of Chinese residents. It provides a theoretical  
65 basis for investigations related to China's carbon emissions and provides a scientific basis for the control and  
66 planning of residents' carbon emissions.

## 67 **2.Methods**

### 68 **2.1 Calculation method of carbon emissions**

69 Carbon emissions can be divided into direct carbon emission calculation and indirect carbon emission  
70 calculation. The direct carbon emission represents the carbon emission generated by residents in the process of  
71 direct energy consumption. It mainly comes from the energy consumption of residents, including carbon  
72 emissions from coal, natural gas, electricity, oil, and geothermal heat [15]. The calculation method is mainly to  
73 use the carbon emission coefficient method, that is, to calculate the carbon emissions of residents' lives based on  
74 the statistical data of various fossil energy sources. This investigation refers to the calculation method of  
75 international greenhouse gas emissions [16], and the calculation equation is as follows.

$$76 \quad C_{ij}=E_{ij} \cdot EF_j \quad (1)$$

77 Where:  $i$  is the  $i$ -th region and  $j$  is the  $j$ -th fuel. When  $j$  is 1, 2, 3...19, it represents 19 kinds of energy  
78 sources such as coal, oil, natural gas, heat, and electricity.  $C_{ij}$  is the carbon emission of the  $j$ -th fuel in the  $i$ -th  
79 region.  $E_{ij}$  is the final consumption of the  $j$ -th fuel in the  $i$ -th region.  $EF_j$  is the CO<sub>2</sub> emission coefficient of the  
80  $j$ -th fuel. This method needs to count plenty of residents' energy consumption data, which takes a long time.

81 Indirect carbon emission refers to judging the consumption of energy by residents' consumption in their  
82 lives and calculating carbon emissions. It mainly corresponds to residents' indirect energy consumption.  
83 Commonly used models mainly include the input-output model, life cycle assessment method, hybrid life cycle  
84 method, and consumer lifestyle method [17]. The calculation equation of the input-output model is as follows.

$$85 \quad CF=F \times E_j=F \times D_j \times (I - A)^{-1} \quad (2)$$

86 Where:  $CF$  represents indirect carbon emissions.  $F$  represents the living consumption of residents.  $E_j$   
87 represents the indirect carbon emission intensity of energy consumption in sector  $j$ .  $D_j$  represents the direct  
88 carbon emission intensity of energy consumption in sector  $j$ .  $A$  represents the matrix of input and output direct  
89 consumption coefficients.  $I$  represents the identity matrix of the same order of  $A$ . However, the scope of the

90 model is wider and there are more sectors. Therefore, the period of preparation and calculation is longer, and  
91 there are greater limitations.

92 The life cycle assessment method mainly evaluates the overall processing, manufacturing, transportation,  
93 and sales of a certain commodity to calculate carbon emissions. Compared with the input-output model, it needs  
94 to obtain plenty of business data. Therefore, the model is more difficult to implement. The hybrid life cycle  
95 method is a combination of input-output and life cycle, considering the micro-scale adaptability of input-output,  
96 and reducing the dependence on business data. The main calculation equation is as follows.

$$97 \quad B = \begin{bmatrix} b & 0 \\ 0 & b \end{bmatrix} \begin{bmatrix} A & M \\ L & I-A \end{bmatrix}^{-1} \begin{bmatrix} k \\ 0 \end{bmatrix} \quad (3)$$

98 Where: B represents the carbon emission of a product. b represents the matrix of microscopic carbon  
99 emission coefficients. A represents the technical matrix. I represents the identity matrix. L represents the input  
100 of the macroeconomic system to the microsystem of the commodity. M represents the input of the commodity  
101 microsystem to the macroeconomic system. K represents the external demand.

102 The consumer lifestyle method is a method that uses lifestyle to explore the relationship between consumer  
103 activities and the environment. It can calculate carbon emissions by measuring various consumption data. The  
104 calculation equation is as follows.

$$105 \quad Q = FY_c \quad (4)$$

106 Where: F represents a row vector, which means the intensity of carbon emissions.  $Y_c$  represents a column  
107 vector, which means the household consumption expenditure. This investigation focuses on the development  
108 trend and prediction methods of carbon emissions. Also, indirect methods have various drawbacks. Therefore, in  
109 the calculation of carbon emissions, the method of direct carbon emissions is selected.

## 110 **2.2 Data source and indicator measurement of carbon emission prediction**

111 The residents' energy consumption structure is diversified. Different regions and households have different  
112 types of energy consumption. For the calculation of carbon emissions, most provinces and cities are used as  
113 administrative units [18]. In this investigation, the carbon emission coefficient method is used to calculate the  
114 direct carbon emissions per capita of residents in 30 provinces, municipalities, and autonomous regions in China  
115 from 1999 to 2019. Among them, 19 kinds of energy consumption of residents' life come from *China Energy*  
116 *Statistical Yearbook* in 2000-2019. The CO<sub>2</sub> emission factor is derived from the *2006 IPCC Guidelines for*  
117 *National Greenhouse Gas Inventories*. The carbon emission coefficients of provinces and cities are derived from

118 the *Emission Factors for China's Regional Grid Baseline in 2019*. The total population, as well as urban and  
119 rural population comes from the *China Statistical Yearbook* in 2000-2019. It should be pointed out that due to  
120 the lack of relevant statistical data, the carbon emission data of the four regions of the Tibet Autonomous  
121 Region, Taiwan Province, Hong Kong, and Macao Special Administrative Region are not included in the  
122 investigated region. The relevant data of the Ningxia Hui Autonomous Region from 2000 to 2002 are missing,  
123 and the moving average method is used to supplement it. MSE is used for measuring the average error, which is  
124 relatively simple. It is used to measure the degree of change in the data. The smaller the MSE value, the higher  
125 the data prediction accuracy of the neural network model [19].

### 126 **2.3 Carbon emissions prediction based on BP neural network model**

127 BP neural network is a supervised learning algorithm, which consists of an input layer, hidden layer, and  
128 output layer. The full connection is formed between neurons of various layers [20]. According to the learning  
129 process, it is divided into a forward propagation and back propagation. The forward propagation is from the  
130 input layer to the hidden layer to the output layer. The back propagation is the signal propagating forward from  
131 the output layer. Each layer of transfer is limited by the weight value. The data information is processed by a  
132 combination of neuron activation function, hidden layer neuron quantity, and weight adjustment rules. Different  
133 network functions can be realized. Its specific structure is shown in Figure 1.

134 Based on the direct carbon emission data processing of Chinese provinces, the per capita carbon emission  
135 data of Fuzhou City is selected as the testing data of the neural network. The specific process is as follows: (1)  
136 Constructing training samples. All data samples are divided into 20 data samples. Since 1999, the last data every  
137 5 years is the algorithm input value. The first 18 samples are the training set, and the last 2 are the testing set. (2)  
138 Carbon emission prediction and result output. For the already trained network, the Fuzhou carbon emission data  
139 in 2015-2019 are predicted and the results are output. Also, the residual error, relative error, and MSE are  
140 selected as the comparison standard of prediction accuracy.

141 [Figure. 1 The schematic diagram of BP neural network structure]

### 142 **2.4 Carbon emissions prediction based on RBF neural network model**

143 RBF (Radial Basis Function) neural network is a three-layer feedforward neural network model with only  
144 one hidden layer. The input layer to the hidden layer uses a non-weighted connection, which can directly  
145 transfer the data to the hidden layer neural unit [21]. Figure 2 shows the structure of the RBF neural network

146 model. It uses radial basis functions as the basis functions. The hidden layer is used to map the input data to the  
147 hidden layer space to complete the nonlinear transformation of the data. The output layer is often linearly  
148 transformed.

149 Based on the direct carbon emission data processing of Chinese provinces, the per capita carbon emission  
150 data of Fuzhou City is selected as the prediction purpose of the neural network. The specific process is as  
151 follows: (1) Sample data structure: The data is based on a 20x31 matrix. The data of other provinces except  
152 Fuzhou is used as the learning sample. Data from Beijing is used for testing. (2) The newrb function is used to  
153 set its network parameters such as allowable error, diffusion factor, and the number of neurons. On this basis,  
154 the same evaluation indicators as the BP neural network are adopted to output the results.

155 [Figure. 2 The schematic diagram of the RBF neural network structure]

## 156 2.5 Carbon emission prediction based on Elman neural network model

157 Elman neural network is a dynamic feedback neural network, which is a neural network model with local  
158 memory and feedback capabilities. For the model, the convergence speed is good and the prediction accuracy is  
159 high. Therefore, it is adopted in many fields [22]. Compared with the above two network models, it has an  
160 additional undertaking layer with memory and feedback functions. The specific structure is shown in Figure 3.  
161 The undertaking layer can feed back to the hidden layer through data and make the network have the function of  
162 dynamic memory and feedback.

163 Based on the direct carbon emission data processing of Chinese provinces, the per capita carbon emission  
164 data of Fuzhou City is selected as the prediction purpose of the neural network. The specific process is as  
165 follows: (1) Training sample determination: Consistent with the training sample method of BP neural network,  
166 the rolling prediction is realized in time series. (2) The elmanet function in the Matlab neural network toolbox  
167 is used to establish the Elman neural network. Also, the delay layer, hidden layer neuron size, training function,  
168 and other network parameters are set. (3) It is consistent with the time selection and measurement indicator of  
169 the BP neural network, and the results are output.

170 [Figure. 3 The schematic diagram of Elman neural network structure]

## 171 2.6 Carbon emission prediction based on GRNN neural network model

172 GRNN (Generalized Regression Neural Network) is a neural network algorithm under radial basis  
173 functions. There is strong curve mapping ability, flexible network structure, high fault tolerance, and fast

174 learning speed in the algorithm. It has been applied in the construction of multiple network models [23]. The  
175 neural network can get a better prediction effect under the premise of a few samples. The specific structure is  
176 shown in Figure 4. In this investigation, 90% of the Fuzhou data in the residential carbon emission data is used  
177 as the training sample, and the rest is the testing sample. The measurement indicators and result output are  
178 similar to the BP neural network.

179 **[Figure. 4 The schematic diagram of the GRNN neural network]**

## 180 **2.7 System requirements and implementation**

181 (1) System requirements: In terms of the basis, the system should have the basic functions of geographic  
182 information system software to implement basic map operations. In terms of parameters, it is necessary to call  
183 the Matlab software, modify the relevant parameters of the Elman neural network, set the predicted province  
184 and year, as well as display and save the carbon emission prediction results. In terms of display, thematic map  
185 creation functions are added to the system, including pie charts, bar charts, and graded coloring charts, more  
186 intuitively understanding the carbon emissions of various years and provinces as well as the composition of  
187 various energy consumption types. Also, it has other necessary functions for the production of related maps.

188 (2) System implementation: This system is developed under the C#.NET environment, based on ArcGIS  
189 Engine 10.2 combined with the neural network toolbox in Matlab R2014a. The C# language is derived from C  
190 and C++. While inheriting the powerful programming functions of C and C++ languages, the complex features  
191 of the two are eliminated. ArcGIS Engine is a complete set of embedded GIS component libraries and tool  
192 libraries that package ArcObjects. It is a complete class used by developers to build custom applications. The  
193 neural network toolbox in Matlab provides a practical technical method for the prediction of China's provincial  
194 carbon emissions. Under the above development environment, this system calls the Elman neural network  
195 prediction model realized by using Matlab neural network toolbox in the form of the dll format, thereby  
196 realizing the integration of system functions.

## 197 **3. Results and discussion**

### 198 **3.1 Total carbon emissions of residents in different years in different provinces**

199 By calculating the data of different provinces and different years, the total carbon emission of residents  
200 shown in Figure 5 is obtained. From the figure, the total carbon emissions of residents in the seven provinces of  
201 Beijing, Tianjin, Hebei, Shanxi, Inner Mongolia, Liaoning, and Jilin in the northern region have not increased



202 much from 2000 to 2010, but the growth rate has risen linearly after 2010. As far as Tianjin is concerned,  
203 compared with 2010, the total carbon emissions of residents in 2018 increases by 4 times. In the southern  
204 regions of Jiangsu, Zhejiang, Anhui, Fujian, and Jiangxi, the total carbon emissions have increased, but the  
205 growth rate has slowed distinctly. Among them, the fluctuations in Shanghai and Shandong provinces are  
206 relatively large, with a clear trend of increasing first and then decreasing. It is closely related to local  
207 environmental protection policies. For the provinces of Shaanxi, Gansu, Ningxia, Qingdao, and Guizhou in the  
208 northwestern region, there is a trend of a decrease after a short rise and then a slow rise.

209 [Figure. 5 Total carbon emissions in different years in different provinces]

### 210 3.2 Prediction results of different carbon emission prediction models in different provinces

211 Different carbon emission prediction models are used to predict the data from 2015 to 2019 in the four core  
212 geographic regions of China, Beijing, Zhejiang, Guangdong, and Shaanxi. The results are shown in Figure 6.  
213 From the figure, except for the large error between the predicted values of 2018 and 2019 obtained by using the  
214 GRNN neural network, the changing trends of the predicted carbon emissions of other neural networks are  
215 almost consistent with the actual carbon emissions. The prediction results are relatively ideal. Compared to the  
216 BP neural network model, the RBF neural network model has a simple structure without requiring repeated  
217 training. But the results show that the neural network has low prediction accuracy and large errors. Compared to  
218 the BP and RBF neural network models, the Elman neural network has higher accuracy in predicting carbon  
219 emission data in four regions and has a better prediction effect.

220 [Figure. 6 Prediction results of different carbon emission prediction models in different provinces]

### 221 3.3 Performance evaluation of different carbon emission prediction models

222 The above data are analyzed for errors and relative errors. Table 1 shows the results. From the table,  
223 compared to the RBF neural network, BP neural network requires multiple trainings according to experience to  
224 determine the better network in different years. Therefore, a large prediction error occurs during the training  
225 process. Compared to the Elman neural network, the RBF neural network model has insufficient robustness and  
226 greater randomness. Therefore, the prediction accuracy is slightly inferior to the Elman neural network. Based  
227 on the above results, the effect of the Elman prediction model is optimal.

228 **Table. 1** Performance evaluation of different carbon emission prediction models

| Numbering | 2016       |                              | 2017       |                              | 2018       |                              | 2019       |                              |
|-----------|------------|------------------------------|------------|------------------------------|------------|------------------------------|------------|------------------------------|
|           | Error size | Relative error ( $10^{-2}$ ) | Error size | Relative error ( $10^{-2}$ ) | Error size | Relative error ( $10^{-2}$ ) | Error size | Relative error ( $10^{-2}$ ) |
| BP        | 0.0128     | 0.6479                       | -0.0095    | -0.4638                      | 0.0138     | 0.486                        | 0.245      | -0.539                       |
| RBF       | -0.01      | -0.5063                      | -0.1028    | -0.5338                      | -0.011     | -0.337                       | -0.124     | -0.375                       |
| Elman     | 0.0042     | 0.2124                       | -0.0149    | -0.0121                      | 0.0035     | 0.115                        | -0.011     | -0.198                       |
| GRNN      | -0.0138    | -0.586                       | -0.114     | 0.376                        | -0.0167    | -0.358                       | 0.187      | -0.449                       |

229 Figure 7 shows the prediction performance evaluation of different carbon emission models. From the figure,  
 230 in terms of MSE, the smaller the value, the higher the accuracy of the model. The MSE of the BP neural  
 231 network model after deep learning is 0.0252. Compared with other models, its accuracy performance is the  
 232 worst. The optimal is the Elman carbon content prediction model. Compared to the BP neural network model,  
 233 accuracy is improved by 55.93%. In terms of average MSE, the larger the value, the better the model prediction  
 234 performance, which is consistent with the accuracy results. Compared to the BP neural network model, the  
 235 prediction performance of the Elman network model is improved by 19.48%. In terms of the goodness of fit, the  
 236 Elman network model has not improved much compared to other network models.

237 **[Figure. 7 Prediction performance evaluation of different carbon emission models]**

### 238 3.4 Prediction results of direct carbon emissions from Chinese residents in the future

239 Based on the above model comparison, the Elman carbon emission prediction model is selected to predict  
 240 the direct carbon emissions of Chinese residents from 2020 to 2035. The results are shown in Table 2. From the  
 241 table, without considering other influencing factors (especially policies), the direct carbon emissions of Chinese  
 242 residents in the next 15 years will still show a steady growth trend in the next 5 years. After 2027, direct carbon  
 243 emissions per capita will show a slight downward trend. Also, in 2032, the carbon emissions per capita will be  
 244 0.8882t/10,000 people. After reaching a weak peak, it will show a slight decrease. Based on the above results, it  
 245 can be concluded that in theory it is expected to reach the peak of carbon emissions around 2027 to 2032.

246 **Table. 2** Prediction results of Chinese residents' direct carbon emissions from 2020 to 2035

| Scenes | Carbon emissions (t/10,000 people) |
|--------|------------------------------------|
|--------|------------------------------------|

|           |        |        |        |        |        |
|-----------|--------|--------|--------|--------|--------|
| 2020-2025 | 0.8829 | 0.8831 | 0.8855 | 0.8852 | 0.8873 |
| 2025-2030 | 0.8882 | 0.8879 | 0.8882 | 0.8874 | 0.8876 |
| 2030-2035 | 0.8879 | 0.8880 | 0.8883 | 0.8881 | 0.8879 |

#### 247 **4. Conclusion**

248 Under the severe pressure of energy saving and emission reduction, through the national statistical data  
249 information, based on the artificial neural network model, mathematical statistics and deep learning methods are  
250 used to learn and analyze the carbon emission data of various provinces in China from 1999 to 2019. Different  
251 neural network models are selected, and the carbon emission data of Fuzhou are used as testing data to make  
252 predictions. The feasibility of the neural network model to predict carbon emission data is verified. Also, the  
253 prediction performance is compared to select a better network, embedding it into the direct carbon emission  
254 prediction system of Chinese provincial residents. It provides an effective operating platform for carbon  
255 emission analysis and prediction. Compared with other models, Elman neural network has higher accuracy and  
256 smaller error in carbon emission prediction. Compared to the BP neural network, the accuracy is improved by  
257 50%, and the prediction performance is improved by nearly 20%. It is better to use this prediction model to  
258 predict residents' carbon emissions. Although the advantages and disadvantages of different models are analyzed  
259 as much as possible, there are still many disadvantages in some places due to limited time and energy: (1)  
260 Affected by factors such as the availability of statistical data over the years and different statistical calibers, the  
261 calculated direct carbon emission data of residents in various years and provinces will inevitably produce errors.  
262 It leads to problems with the conclusions reached. (2) At present, more empirical methods are used to obtain a  
263 more ideal network model. The network testing process is relatively cumbersome and the workload is large. In  
264 this process, subjective factors will have a certain impact on network performance. Next, in-depth investigations  
265 will be conducted in these two aspects, quickly and efficiently predicting and analyzing the carbon emissions of  
266 residents.

#### 267 **References**

- 268 1. Mase AS, Gramig BM, Prokopy LS. Climate change beliefs, risk perceptions, and adaptation behavior  
269 among Midwestern US crop farmers. *Climate Risk Management*. 2017, 15, pp. 8-17.

- 270 2. Zscheischler J, Westra S, Van Den Hurk BJ, Seneviratne SI, Ward PJ, Pitman A, AghaKouchak A, Bresch  
271 DN, Leonard M, Wahl T. Future climate risk from compound events. *Nature Climate Change*. 2018, 8(6),  
272 pp. 469-477.
- 273 3. Ang B, Su B. Carbon emission intensity in electricity production: A global analysis. *Energy Policy*. 2016,  
274 94, pp. 56-63.
- 275 4. Wolde RY, Weldemeskel EM. Environmental policy stringency, renewable energy consumption and CO2  
276 emissions: Panel cointegration analysis for BRIICTS countries. *International Journal of Green Energy*.  
277 2020, pp. 1-15.
- 278 5. Zhang D, Wang J, Lin Y, Si Y, Huang C, Yang J, Huang B, Li W. Present situation and future prospect of  
279 renewable energy in China. *Renewable and Sustainable Energy Reviews*. 2017, 76, pp. 865-871.
- 280 6. Lyu Y. Evaluating carbon dioxide emissions in undertaking offshored production tasks: the case of China.  
281 *Journal of Cleaner Production*. 2016, 116, pp. 32-39.
- 282 7. Wang Q, Su M, Li R. Toward to economic growth without emission growth: The role of urbanization and  
283 industrialization in China and India. *Journal of cleaner production*. 2018, 205, pp. 499-511.
- 284 8. Wang Z, Yang Y. Features and influencing factors of carbon emissions indicators in the perspective of  
285 residential consumption: Evidence from Beijing, China. *Ecological Indicators*. 2016, 61, pp. 634-645.
- 286 9. Lu H, Li Y, Uemura T, Kim H, Serikawa S. Low illumination underwater light field images reconstruction  
287 using deep convolutional neural networks. *Future Generation Computer Systems*. 2018, 82, pp. 142-148.
- 288 10. Wu JM T, Tsai M H, Huang Y Z, Islam S H, Hassan M M, Alelaiwi A, Fortino G. Applying an ensemble  
289 convolutional neural network with Savitzky–Golay filter to construct a phonocardiogram prediction model.  
290 *Applied Soft Computing*. 2019, 78, pp. 29-40.
- 291 11. Ye H, Ren Q, Hu X, Lin T, Shi L, Zhang G, Li X. Modeling energy-related CO<sub>2</sub> emissions from office  
292 buildings using general regression neural network. *Resources, Conservation and Recycling*. 2018, 129, pp.  
293 168-174.
- 294 12. Balki MK, Çavuş V, Duran İU, Resul T, Sayin C. Experimental study and prediction of performance and  
295 emission in an SI engine using alternative fuel with artificial neural network. *International Journal of*  
296 *Automotive Engineering and Technologies*. 2018, 7(1), pp. 58-64.
- 297 13. Liu Y, Tian Y, Chen M. Research on the prediction of carbon emission based on the chaos theory and  
298 neural network. *International Journal Bioautomation*. 2017, 21(4), pp. 339-348.

- 299 14. Kim Y, Jang H, Kim J, Lee J. Prediction of storage efficiency on CO<sub>2</sub> sequestration in deep saline aquifers  
300 using artificial neural network. *Applied energy*. 2017, 185, pp. 916-928.
- 301 15. Peng C. Calculation of a building's life cycle carbon emissions based on Ecotect and building information  
302 modeling. *Journal of Cleaner Production*. 2016, 112, pp. 453-465.
- 303 16. Yan F, Wang Y, Du Z, Chen Y, Chen Y. Quantification of ecological compensation in Beijing-Tianjin-  
304 Hebei based on carbon footprint calculated using emission factor method proposed by IPCC. *Transactions*  
305 *of the Chinese Society of Agricultural Engineering*. 2018, 34(4), pp. 15-20.
- 306 17. Meng W, Xu L, Hu B, Zhou J, Wang Z. Quantifying direct and indirect carbon dioxide emissions of the  
307 Chinese tourism industry. *Journal of Cleaner Production*. 2016, 126, pp. 586-594.
- 308 18. Liu X, Duan Z, Shan Y, Duan H, Wang S, Song J. Low-carbon developments in Northeast China:  
309 Evidence from cities. *Applied Energy*. 2019, 236, pp. 1019-1033.
- 310 19. Figueroa-López JE, Mancini C. Optimum thresholding using mean and conditional mean squared error.  
311 *Journal of Econometrics*. 2019, 208(1), pp. 179-210.
- 312 20. Wang B, Gu X, Ma L, Yan S. Temperature error correction based on BP neural network in meteorological  
313 wireless sensor network. *International Journal of Sensor Networks*. 2017, 23(4), pp. 265-278.
- 314 21. Chen D. Research on traffic flow prediction in the big data environment based on the improved RBF neural  
315 network. *IEEE Transactions on Industrial Informatics*. 2017, 13(4), pp. 2000-2008.
- 316 22. Liu H, Mi XW, Li YF. Wind speed forecasting method based on deep learning strategy using empirical  
317 wavelet transform, long short term memory neural network and Elman neural network. *Energy conversion*  
318 *and management*. 2018, 156, pp. 498-514.
- 319 23. Hu Z, Zhao Q, Wang J. The prediction model of worsted yarn quality based on CNN-GRNN neural  
320 network. *Neural Computing and Applications*. 2019, 31(9), pp. 4551-4562.

321

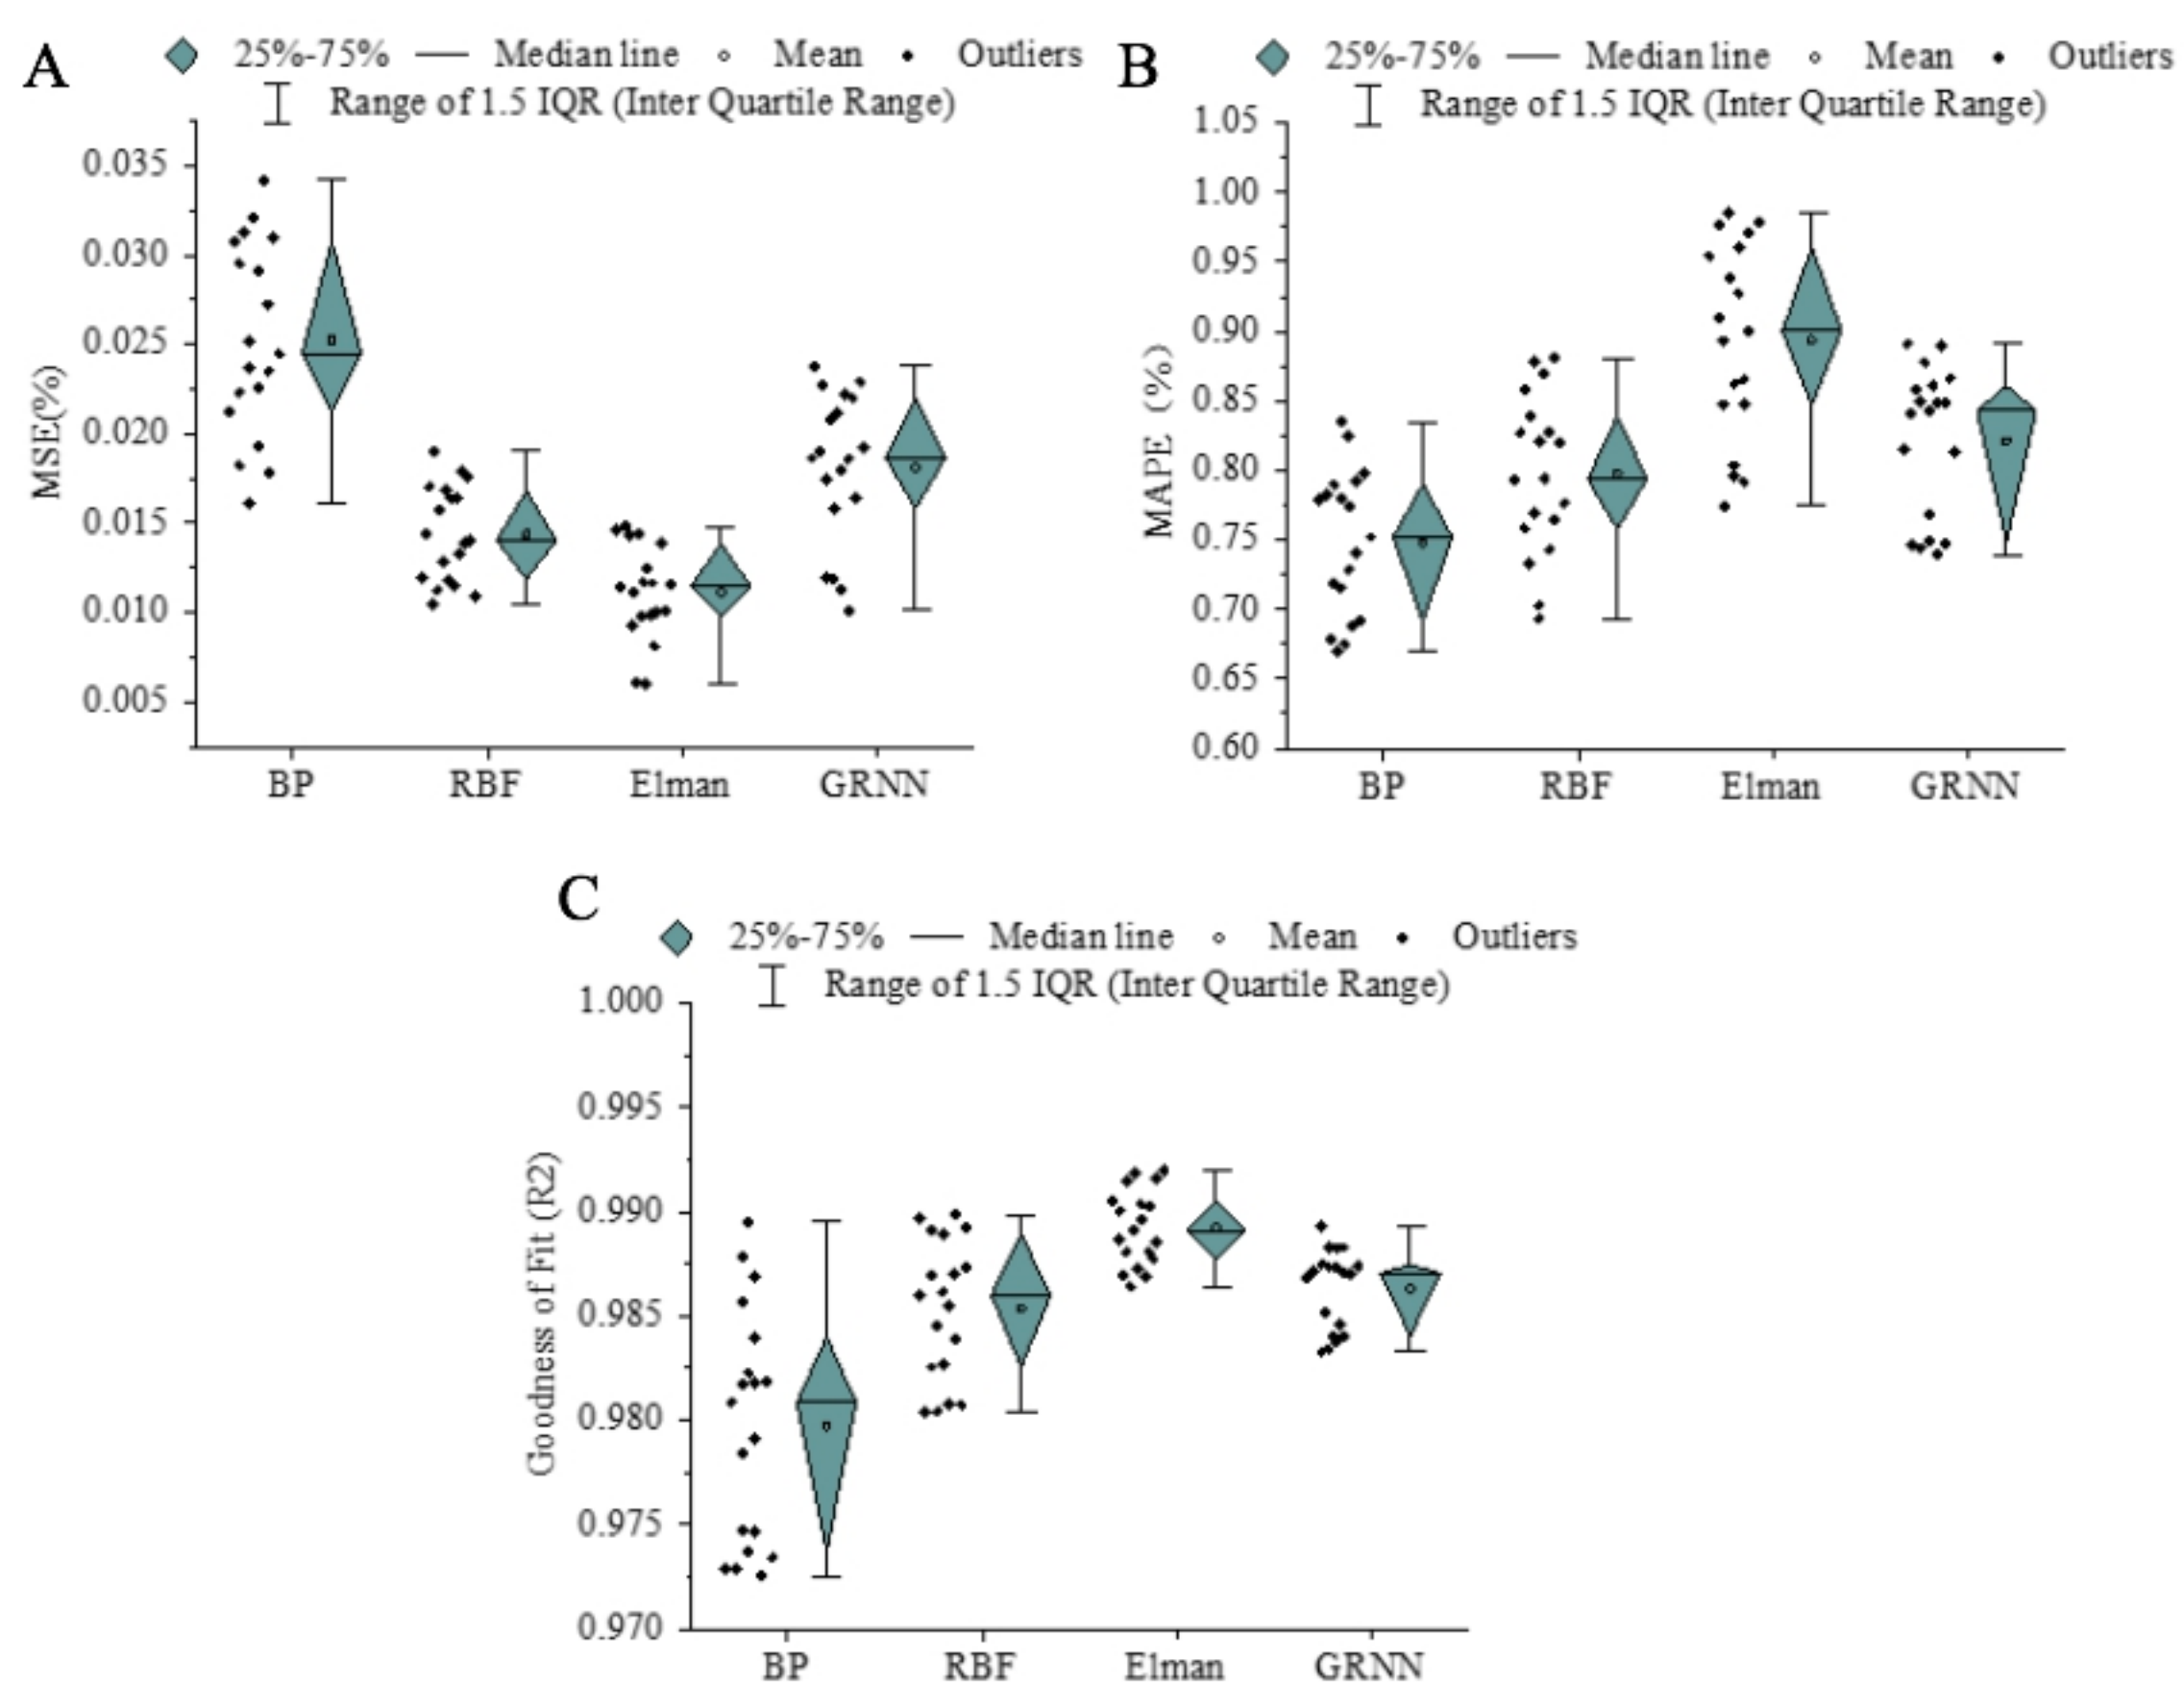

Figure. 7

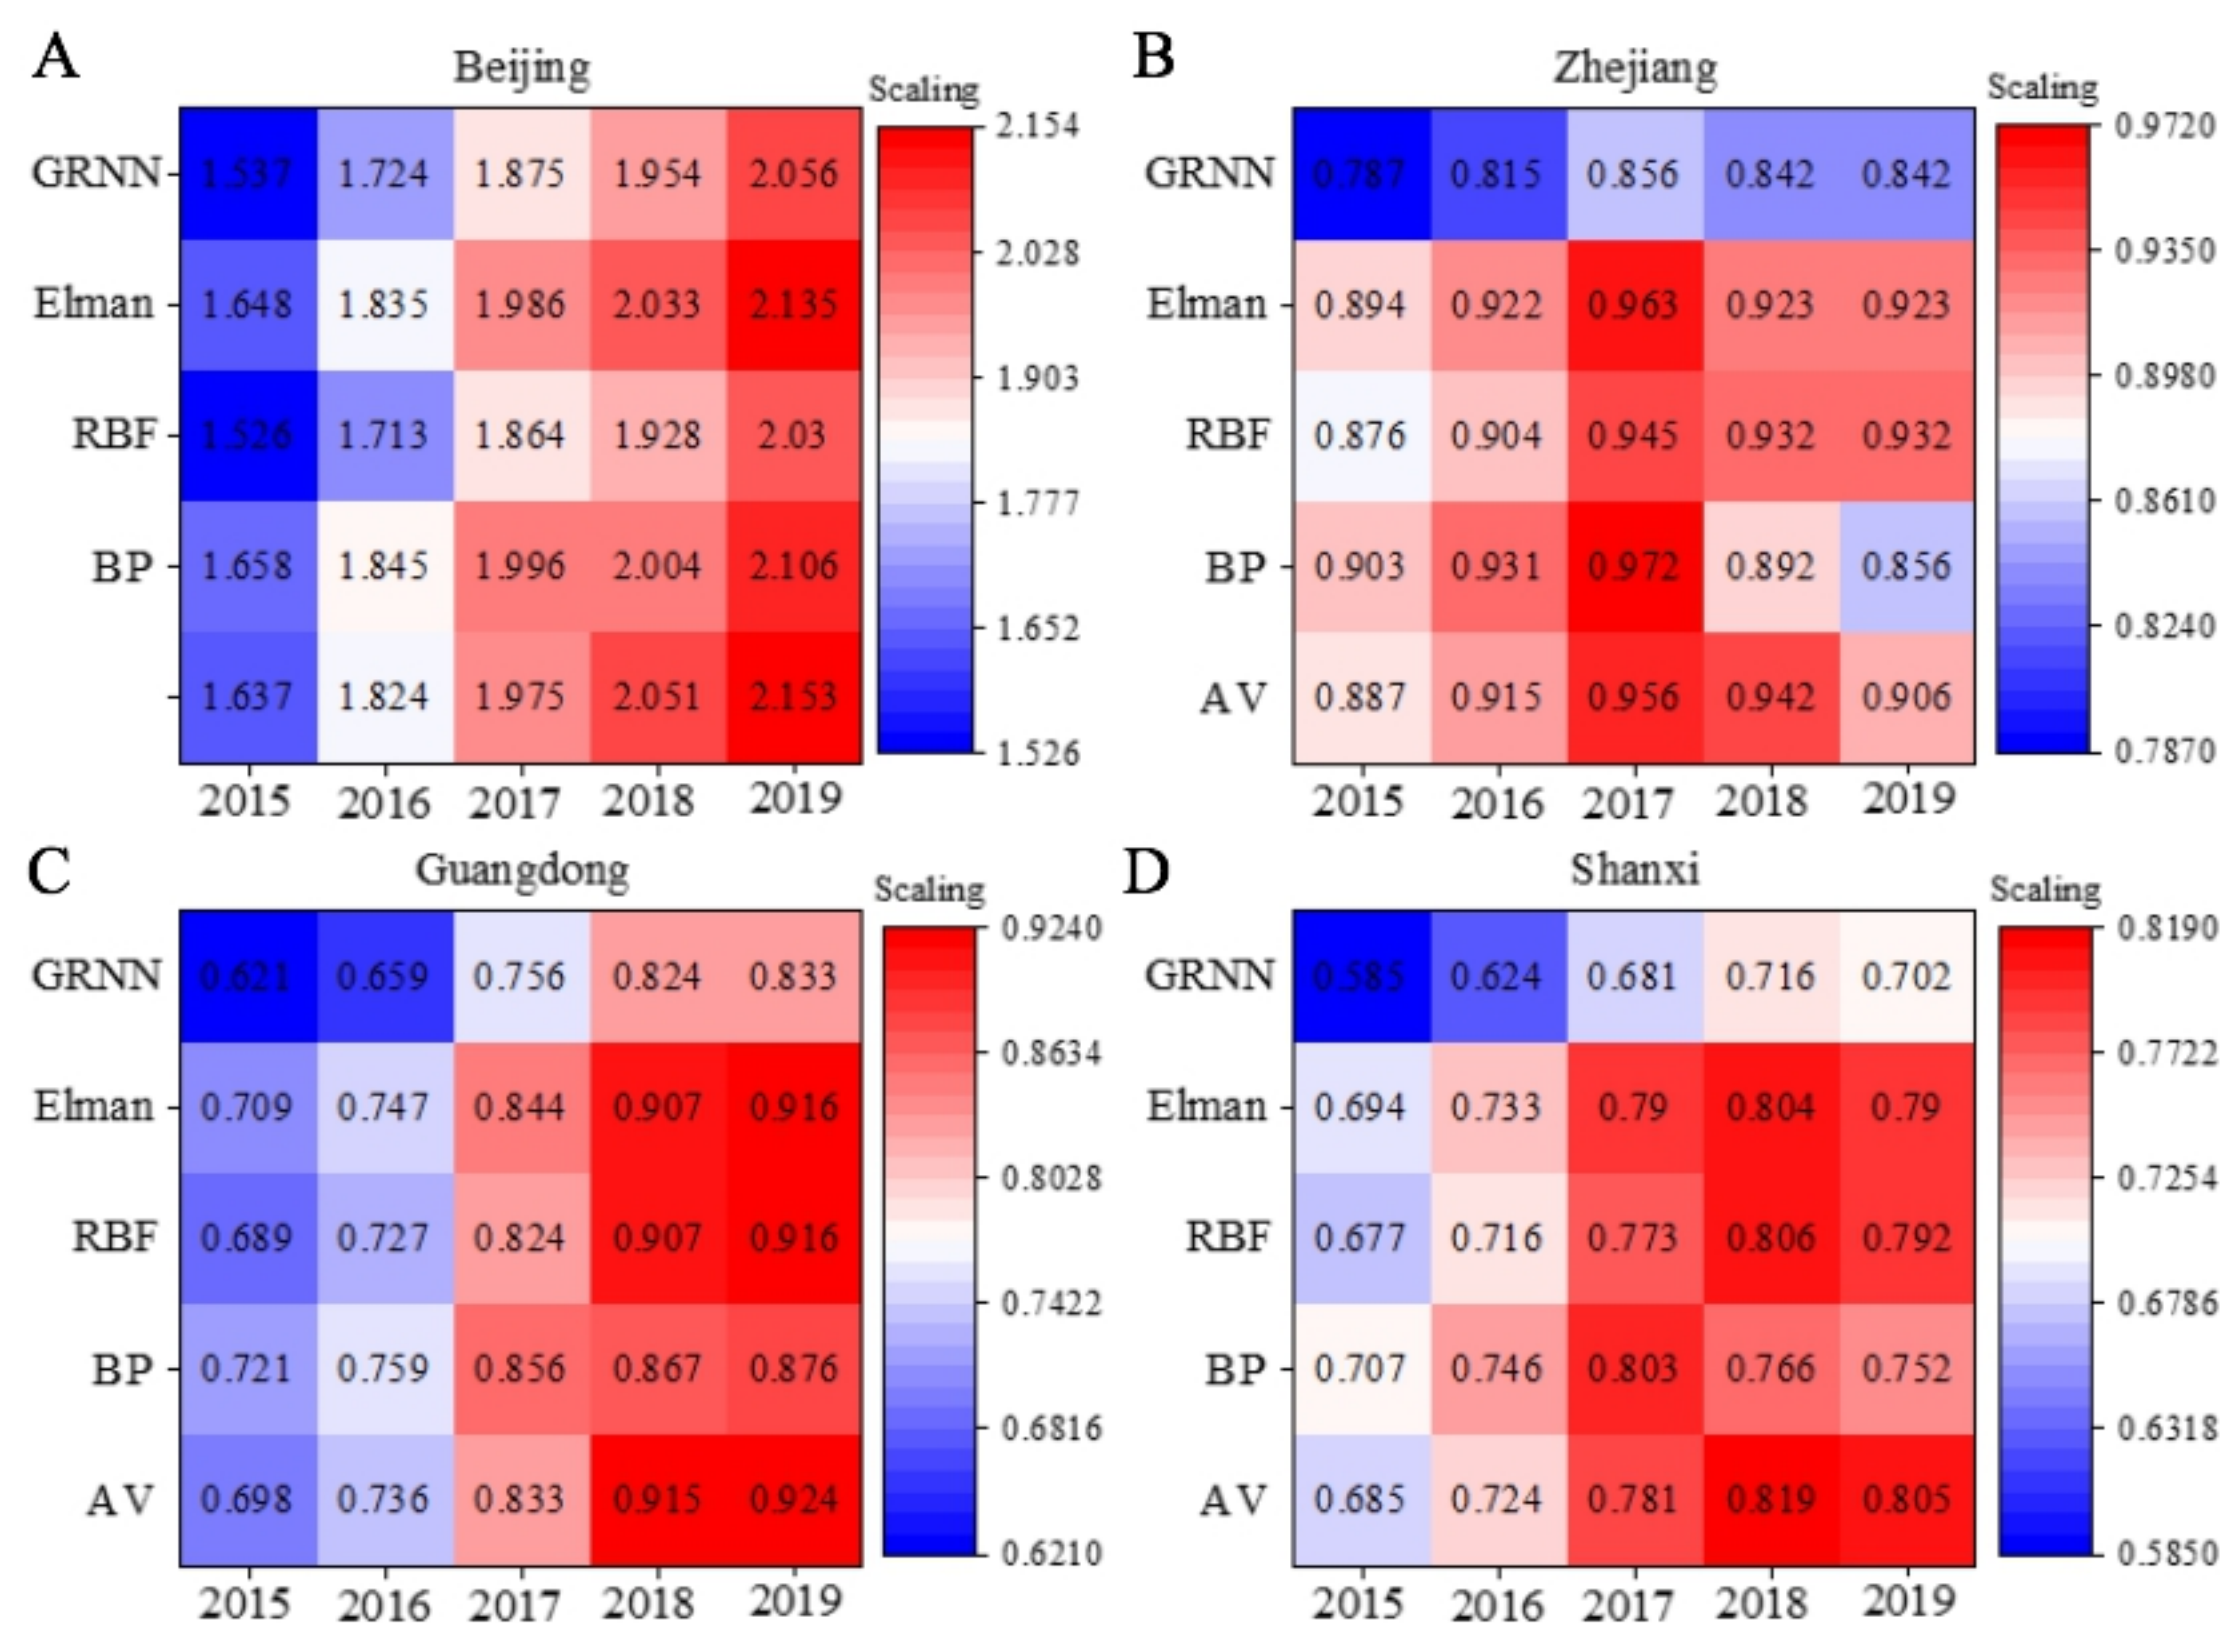

Figure. 6

**A**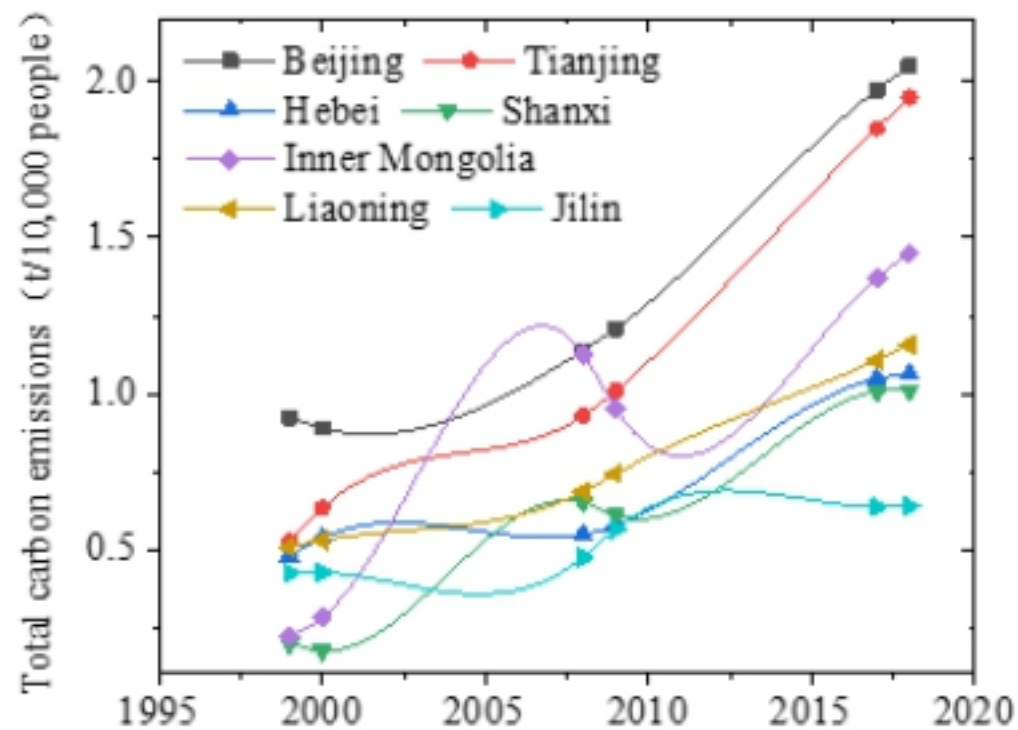**B**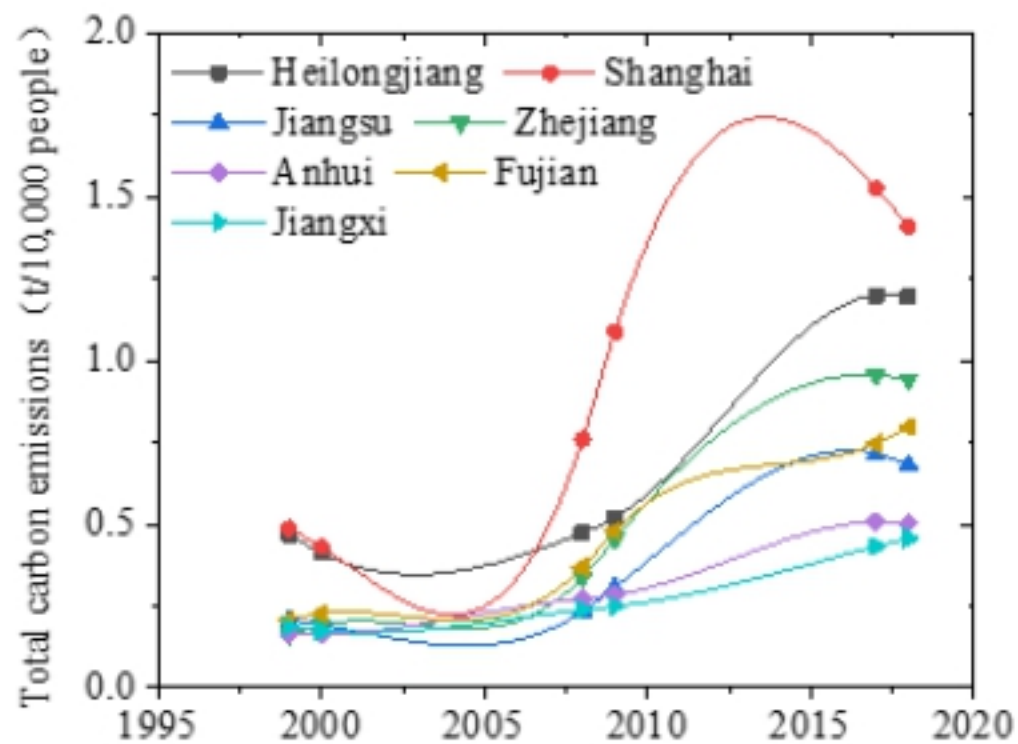**C**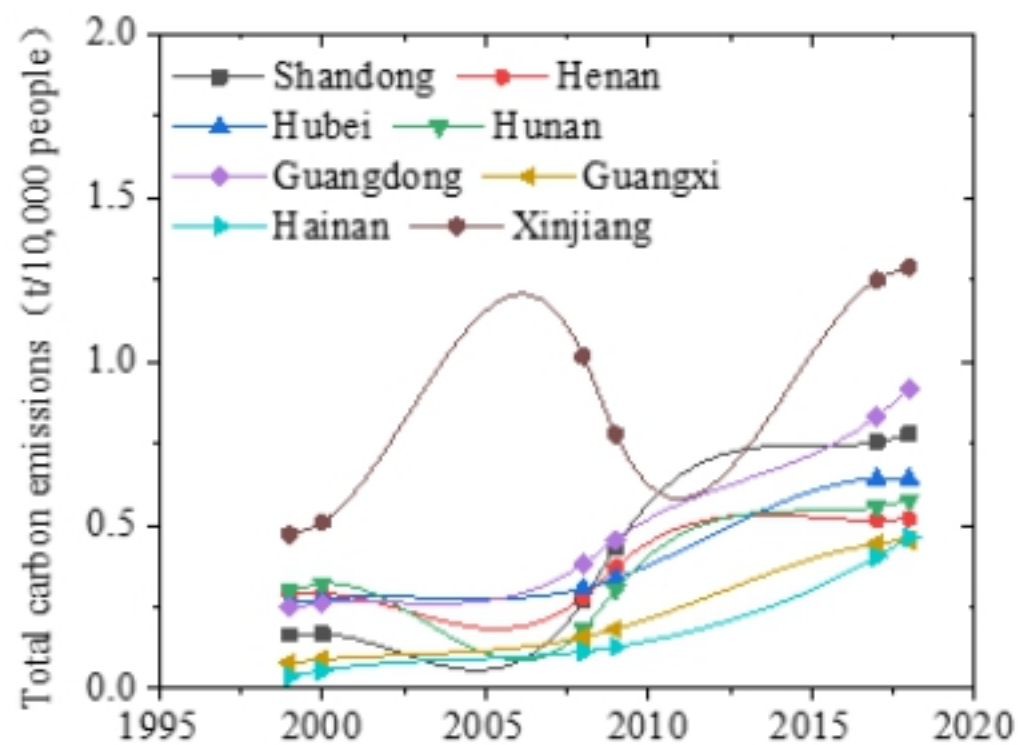**D**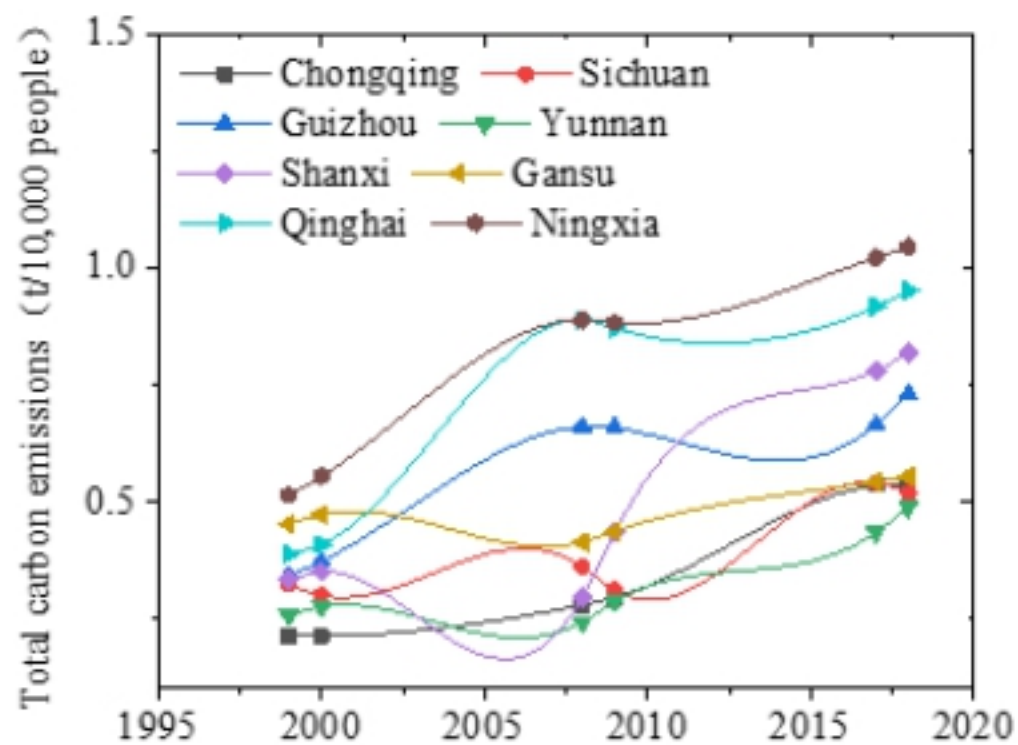

Figure. 5



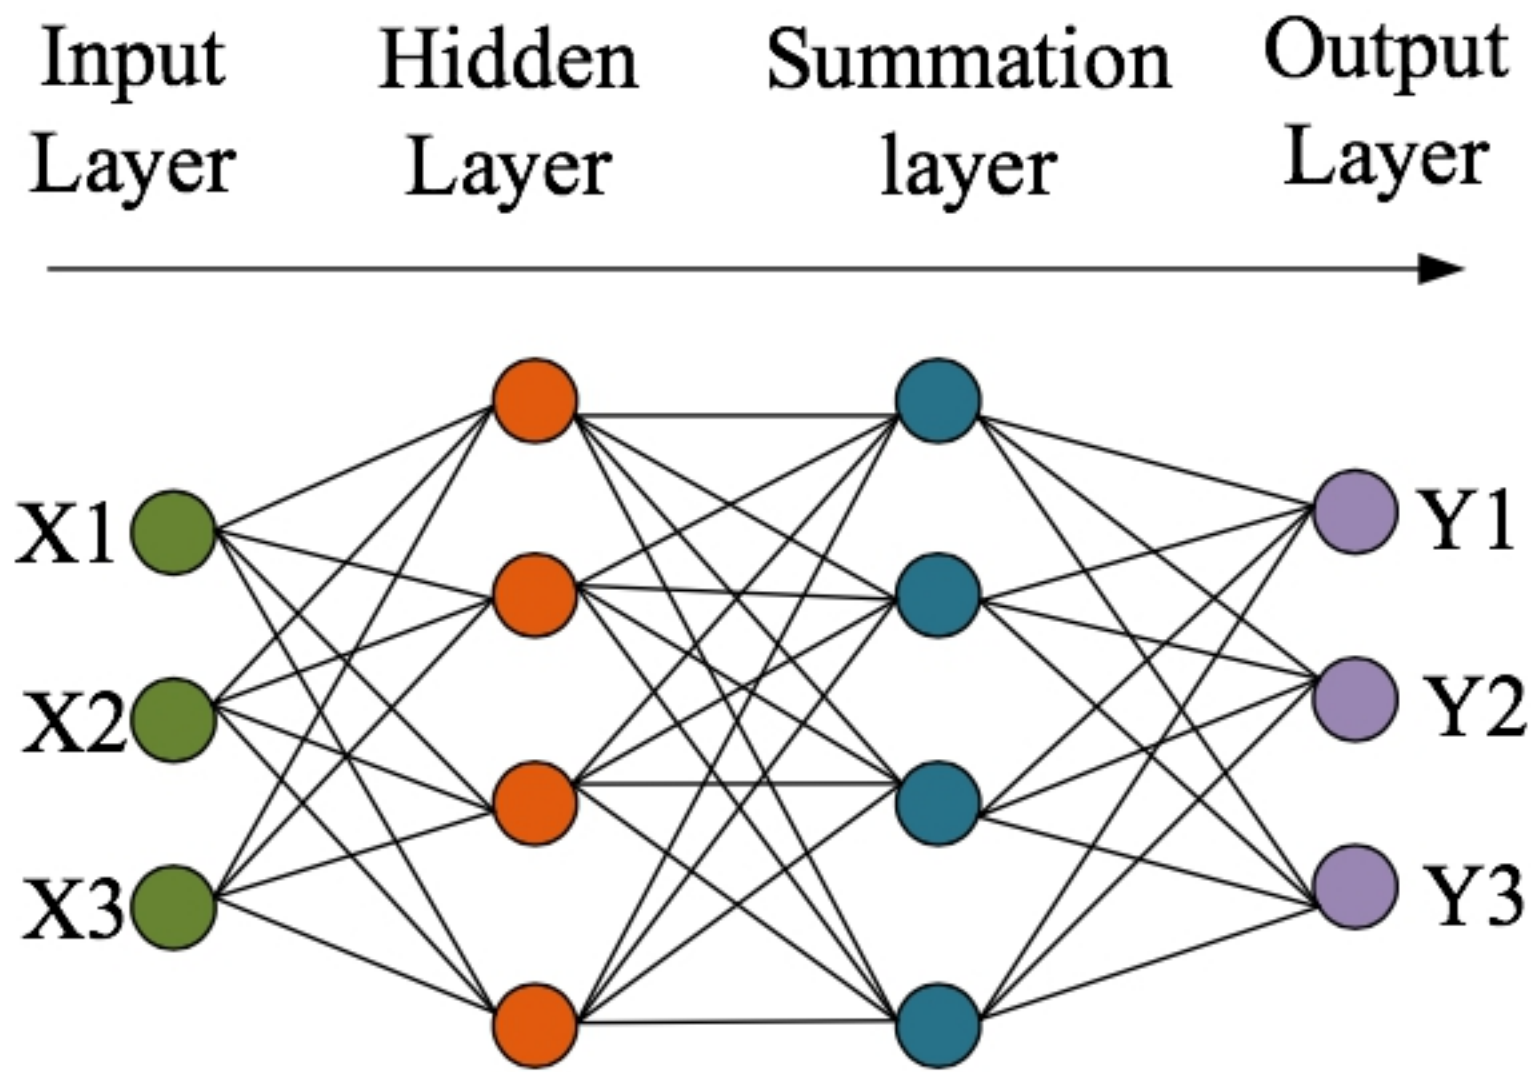

Figure. 4

Prediction

Patter Prediction

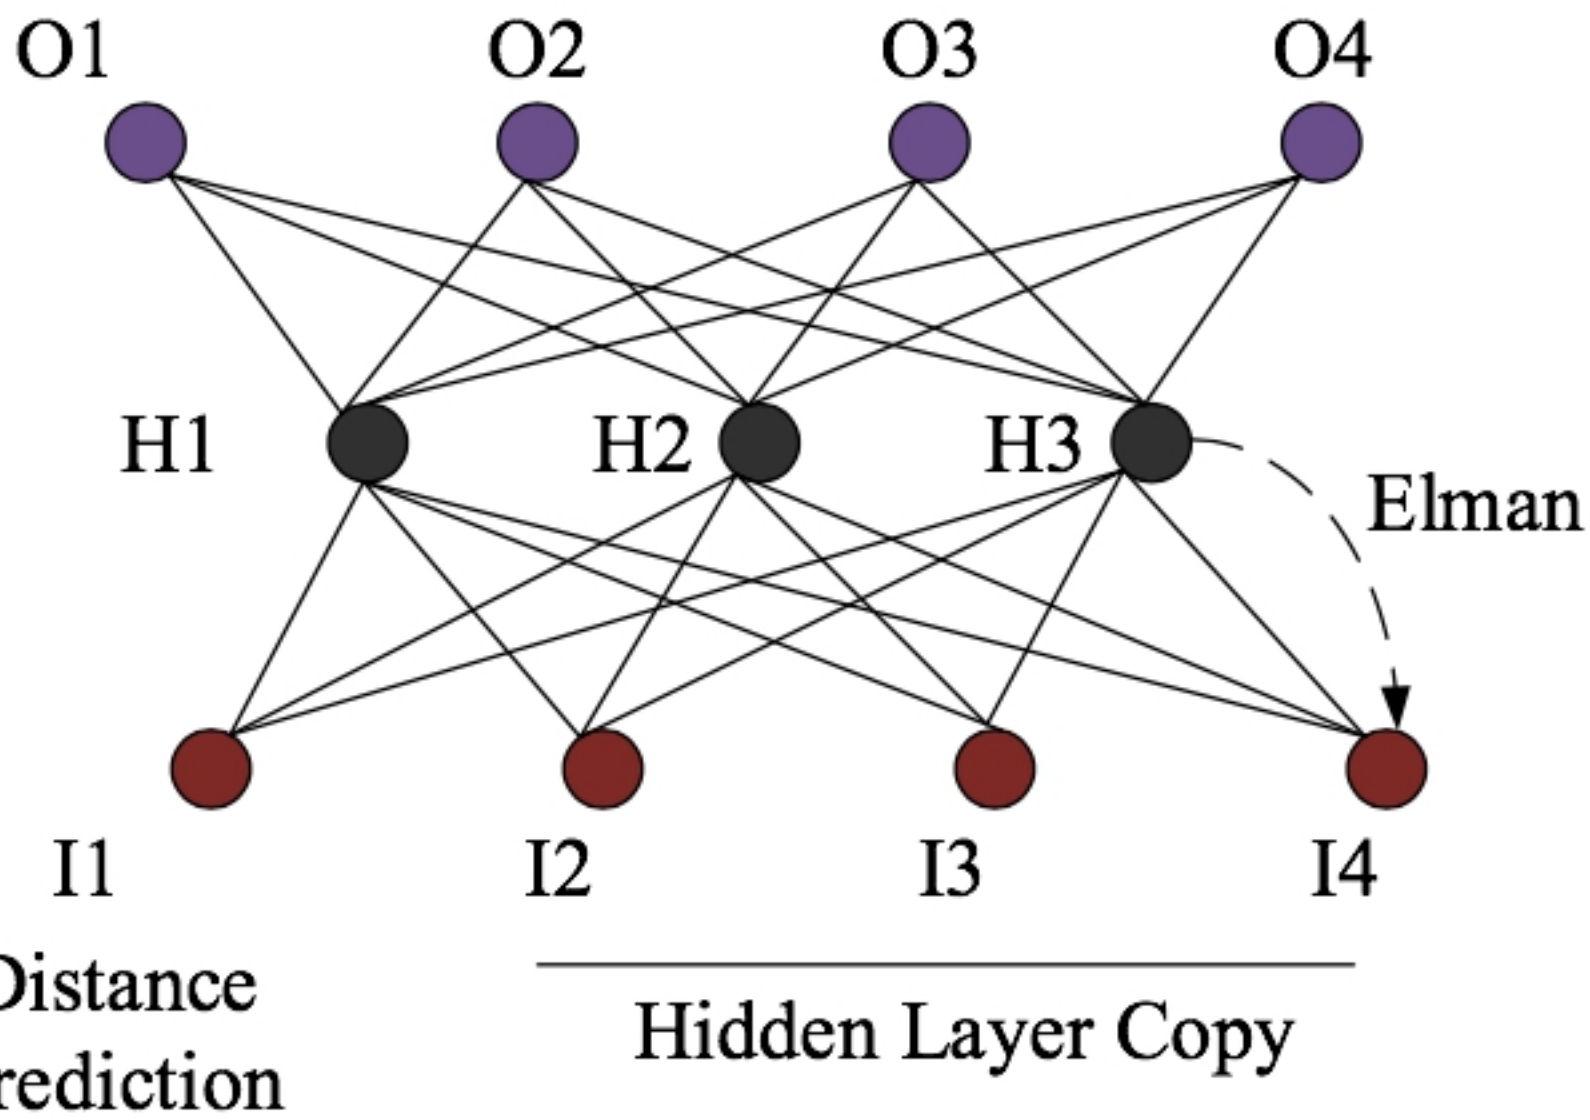

Figure. 3

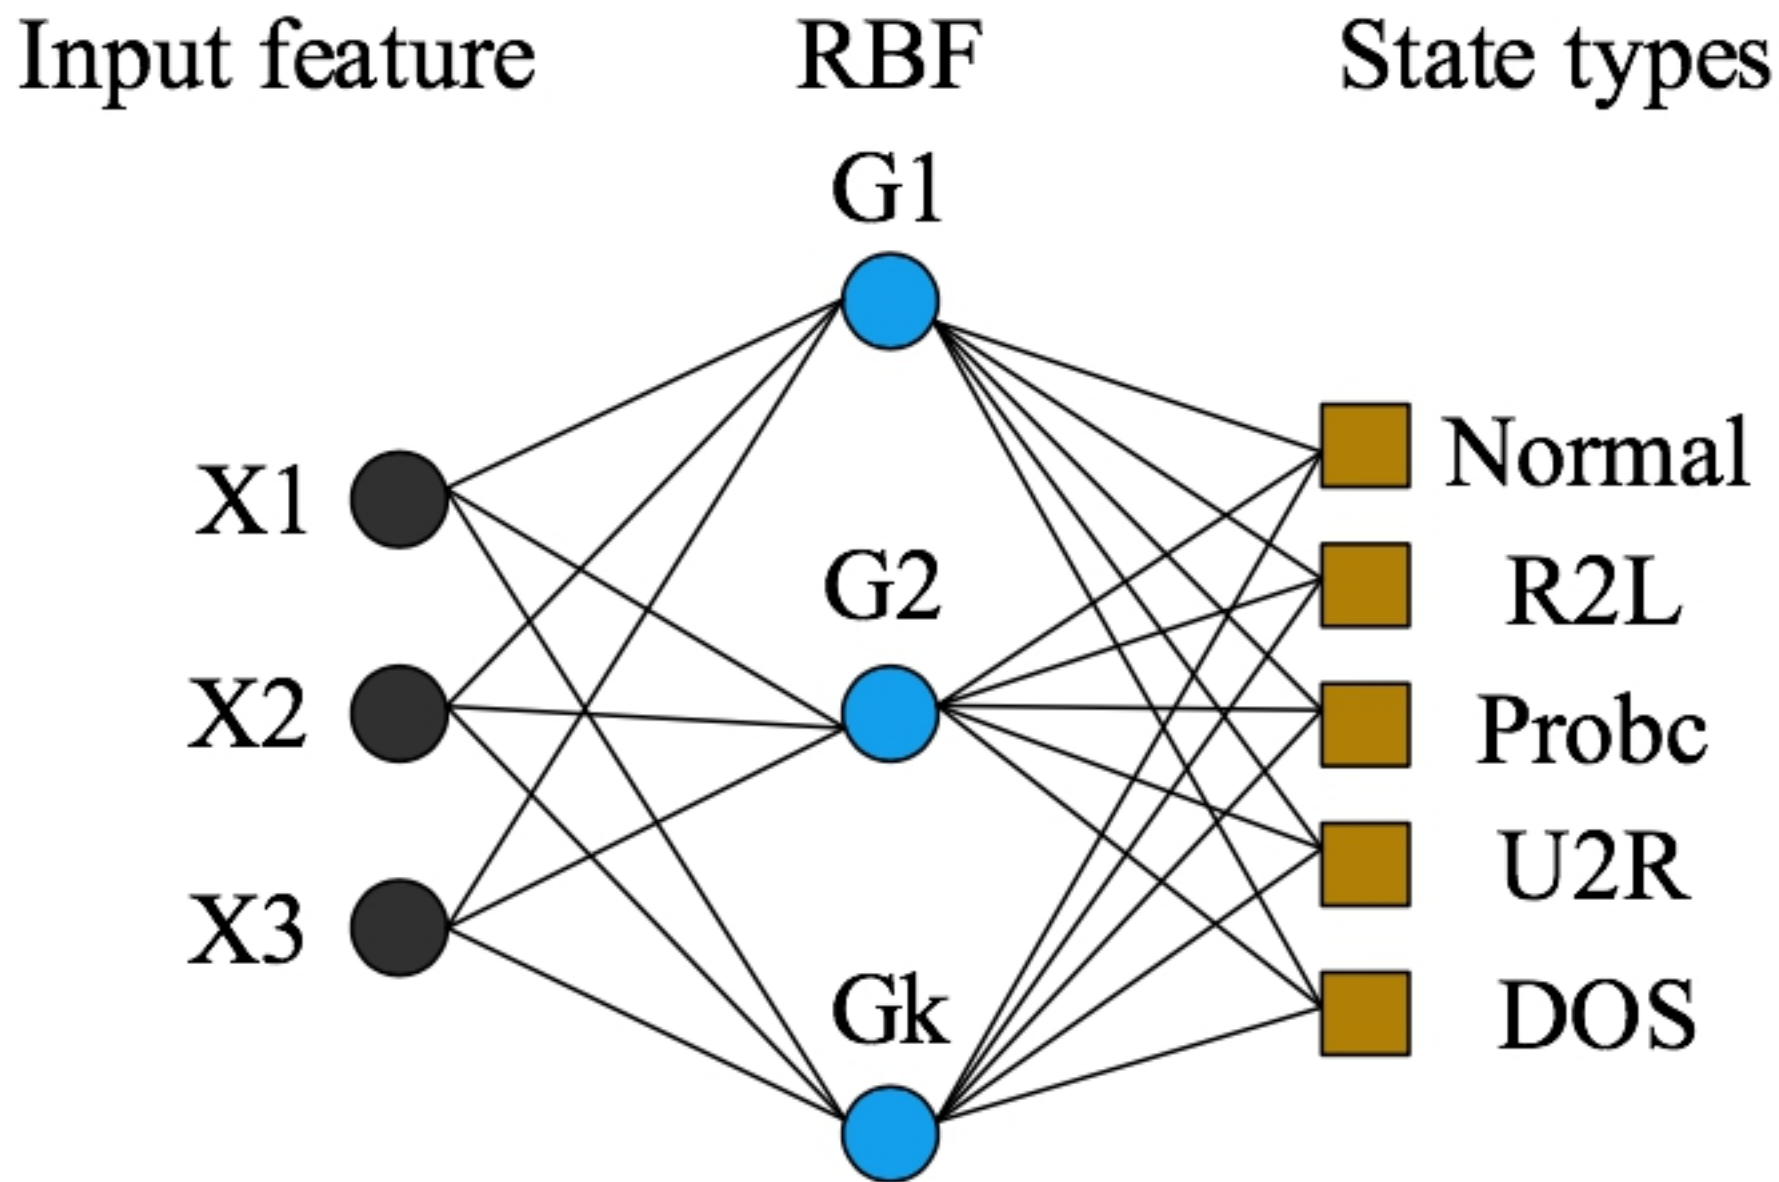

Figure. 2

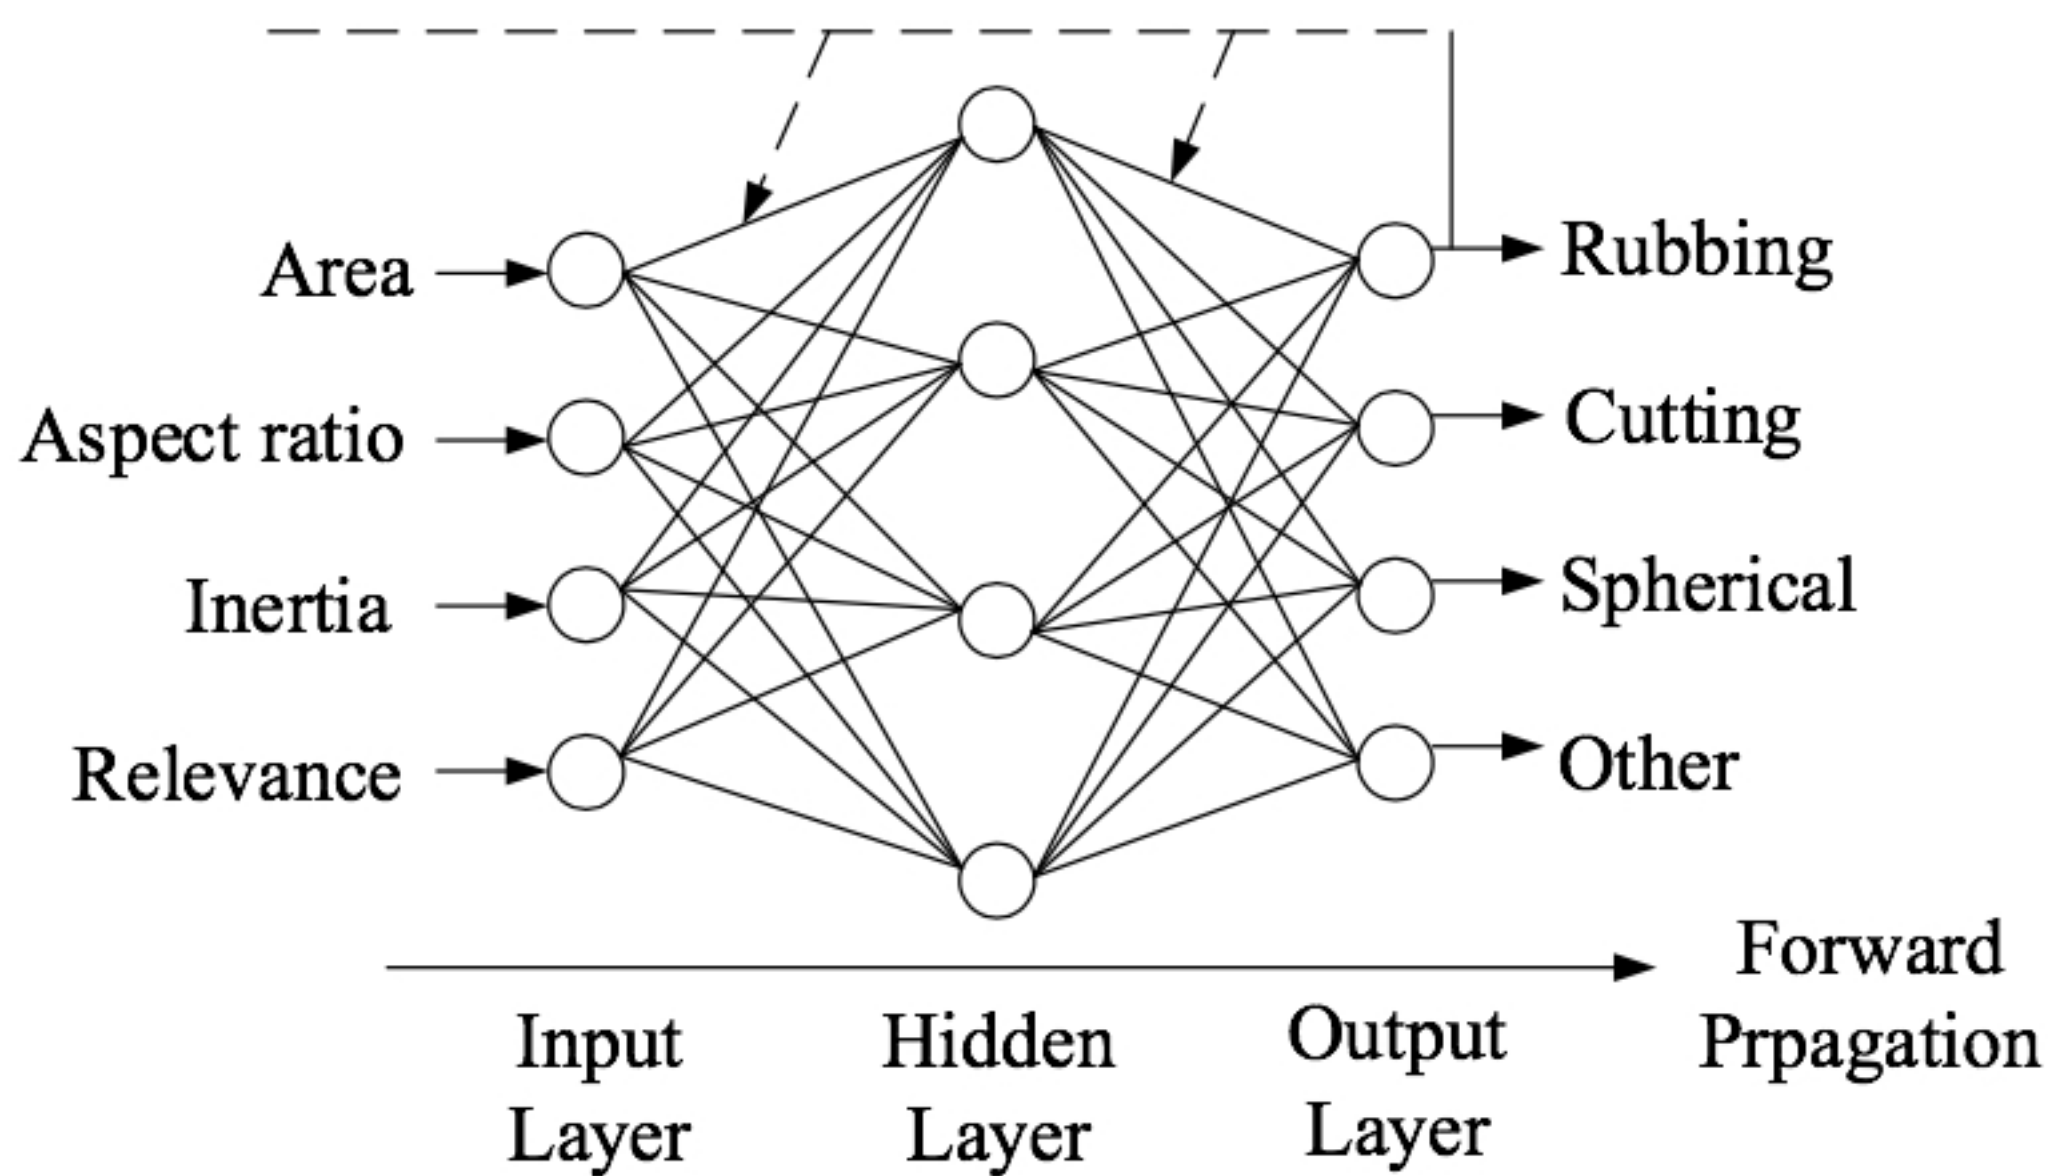

Figure. 1
